# Supplementary material for: High-temperature redox chemistry of La1.5+xSr0.5−xCo0.5Ni0.5O4+δ (x = 0.0, 0.2) studied in situ by neutron diffraction
Source: Royal Society of Chemistry journal article supplement (doi:10.1039/c1jm10445d), 2011-01-01
Supplement: c1jm10445d.pdf [file c1jm10445d.pdf]

Supporting Information for

**High-temperature redox chemistry**  
**of  $\text{La}_{1.5+x}\text{Sr}_{0.5-x}\text{Co}_{0.5}\text{Ni}_{0.5}\text{O}_{4+\delta}$  ( $x = 0.0, 0.2$ ) studied *in situ* by**  
**neutron diffraction**

F. Tonus<sup>1</sup>, C. Greaves<sup>3,\*</sup>, H. El Shinawi<sup>3,#</sup>, T. Hansen<sup>2</sup>, O. Hernandez<sup>1</sup>,  
P. D. Battle<sup>4,\*</sup> and M. Bahout<sup>1,\*</sup>

<sup>1</sup>Sciences Chimiques de Rennes, UMR 6226 CNRS-Université Rennes 1, Campus de Beaulieu, Avenue du Général Leclerc, F-35042 Rennes, France

<sup>2</sup>Institut Laue-Langevin, 6, rue Jules Horowitz F-38000 Grenoble, France

<sup>3</sup>School of Chemistry, University of Birmingham, Edgbaston, Birmingham, B15 2TT, U. K.

<sup>4</sup>Inorganic Chemistry Laboratory, University of Oxford, South Parks Road, Oxford, OX1 3QR, U. K.

# present address: Chemistry Department, Faculty of Science, Mansoura University, 35516 Mansoura, Egypt

**Figure S1.** Rietveld refinements of the neutron powder diffraction patterns of  $\text{La}_{1.7}\text{Sr}_{0.3}\text{Co}_{0.5}\text{Ni}_{0.5}\text{O}_{4+\delta}$  ( $x = 0.2$ ) **(a)** at 43 °C before hydrogen reduction, **(b)** at 600 °C after reduction, **(c)** at 57 °C after reduction. The lower set of tick marks correspond to a  $\text{La}(\text{OH})_3$  impurity at 43 °C and a  $\text{La}_2\text{O}_3$  impurity at 600 and 57 °C. The undulating background in (b) and (c) is due to diffuse scattering from the quartz tube.

**Figure S2.** Difference Fourier map at  $z = 0.25$  showing the presence of an interstitial anion in as-prepared  $\text{La}_{1.5}\text{Sr}_{0.5}\text{Co}_{0.5}\text{Ni}_{0.5}\text{O}_{4+\delta}$ .

**Figure S3.** Difference Fourier map at  $z = 0.25$  showing the presence of an interstitial anion at room temperature in  $\text{H}_2$ -reduced  $\text{La}_{1.7}\text{Sr}_{0.3}\text{Co}_{0.5}\text{Ni}_{0.5}\text{O}_{3.90(1)}$ .

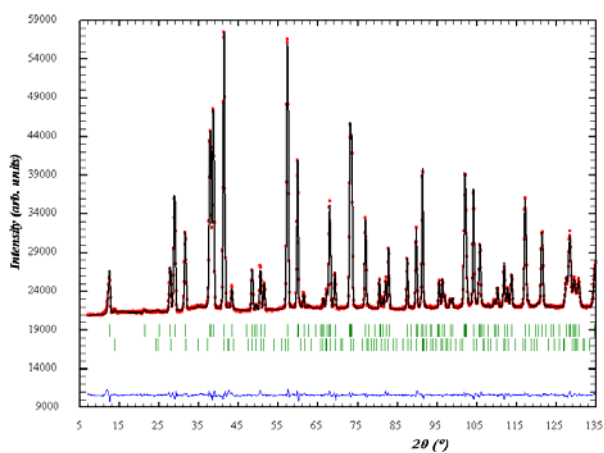

(a)

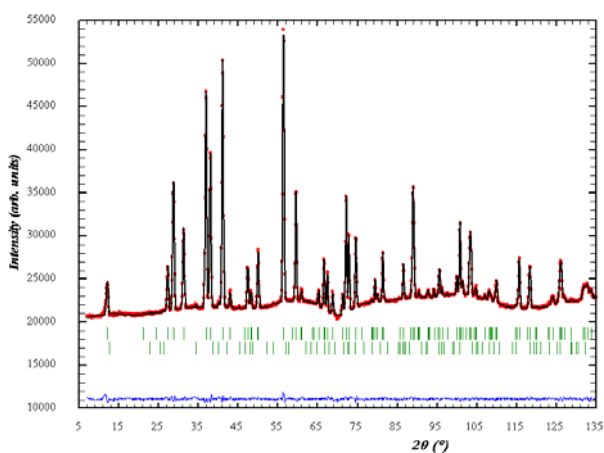

(b)

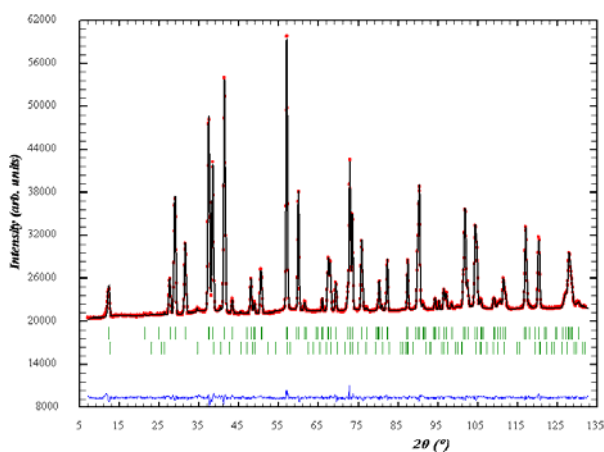

(c)

Figure S1

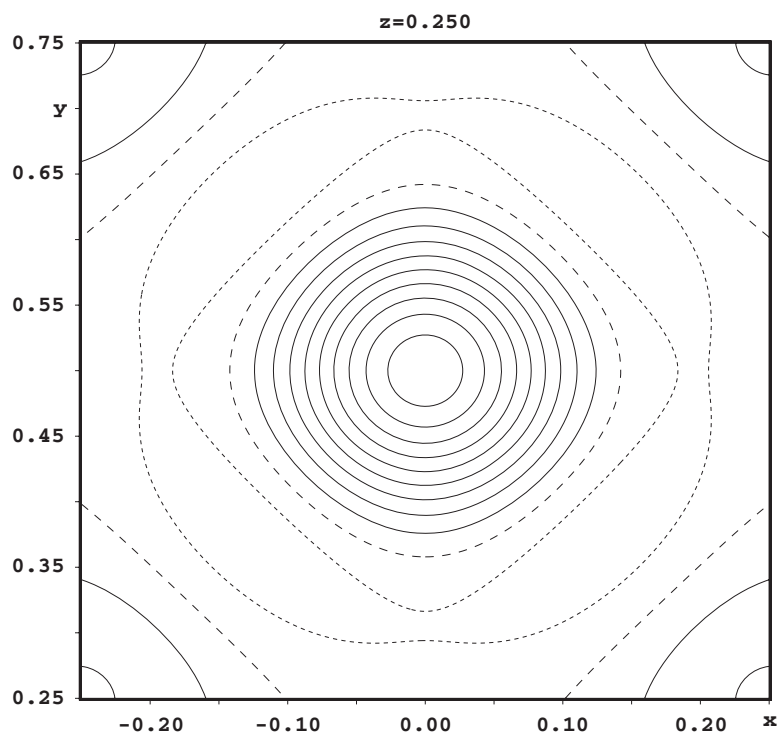

**Figure S2**

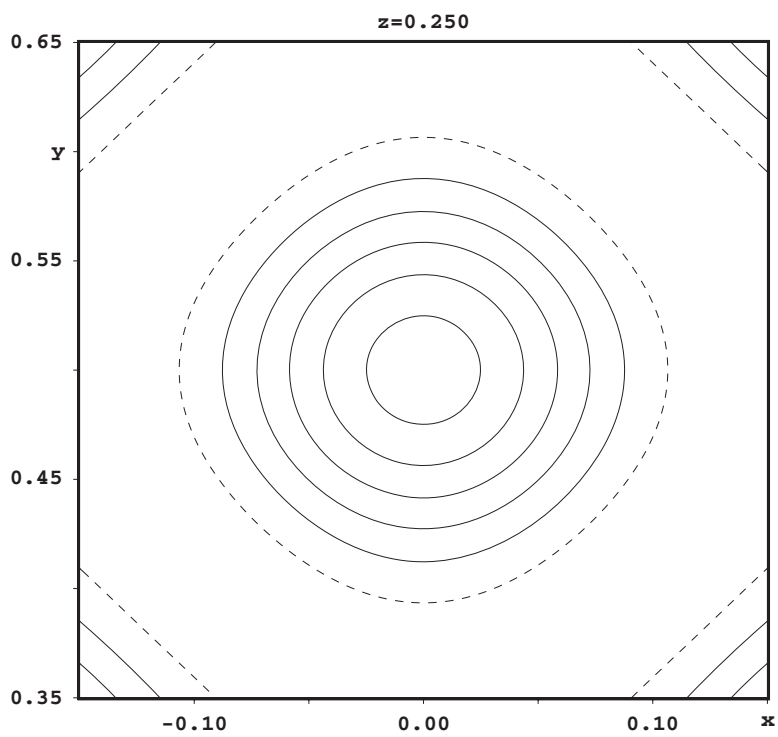

**Figure S3**
